# Supplementary material
Source: PubMed Central journal article supplement (PMC4279072)
Supplement: peds.2014-2475_peds.2014-2475SupplementaryData.pdf [file peds.2014-2475_peds.2014-2475SupplementaryData.pdf]

## Supplemental Information

**SUPPLEMENTAL TABLE 4** Examples of Text Message Reminders

|                             |                                                                                                                                                                                                                                                                                                                                                                                                                                                                                                                                                                                                                                                                                                                                                              |
|-----------------------------|--------------------------------------------------------------------------------------------------------------------------------------------------------------------------------------------------------------------------------------------------------------------------------------------------------------------------------------------------------------------------------------------------------------------------------------------------------------------------------------------------------------------------------------------------------------------------------------------------------------------------------------------------------------------------------------------------------------------------------------------------------------|
| Conventional reminders      | <p>Jose has gotten his first flu shot of the season. Remember, he needs a second dose in 3 weeks.</p> <p>Remember, your child Jose is due for his second flu dose in 1 week!</p> <p>Please bring Jose into [Name] Clinic for his second flu dose as soon as you can after 10/25/12. Walk-in Mon–Wed, Fri 8:30–3; Thurs 9:40–3 PM</p> <p>Come to [Name] Clinic for Jose's second flu shot! Walk-in hours: Mon–Wed, Fri 8:30–3; Thurs 9:40–3 PM</p> <p>Jose is past due for his second flu shot. Bring him to [Name] Clinic! Walk-in times: Mon–Wed, Fri 8:30–3; Thurs 9:40–3 PM</p>                                                                                                                                                                           |
| Vaccine education reminders | <p>Jose has gotten his first flu shot of the season. He will not be protected against the flu until after he gets a second dose in 3 weeks.</p> <p>Jose is due for second flu dose in 1 week! Reply 1, 2, or 3 for info: 1 = Why 2 doses; 2 = Why timing is important; 3 = Adverse effects</p> <p>Jose is not protected from the flu until 2 weeks after second shot. Come in right after 10/25/12. [Name] Clinic Mon–Wed, Fri 8:30–3; Thurs 9:40–3 PM</p> <p>Doctors recommend children like Jose get second flu shot 4 weeks after first. Come to [Name] Clinic Mon–Wed, Fri 8:30–3; Thurs 9:40–3 PM</p> <p>Jose still needs second flu shot to be protected from flu. Bring him to [Name] Clinic! Walk-in hours: Mon–Wed, Fri 8:30–3; Thurs 9:40–3 PM</p> |
